# Supplementary material
Source: publisher site journal article supplement (https://www.dovepress.com/article/432556)
Supplement: Supplementary file 1 [file get_supplementary_file.php]

Supplementary Figures


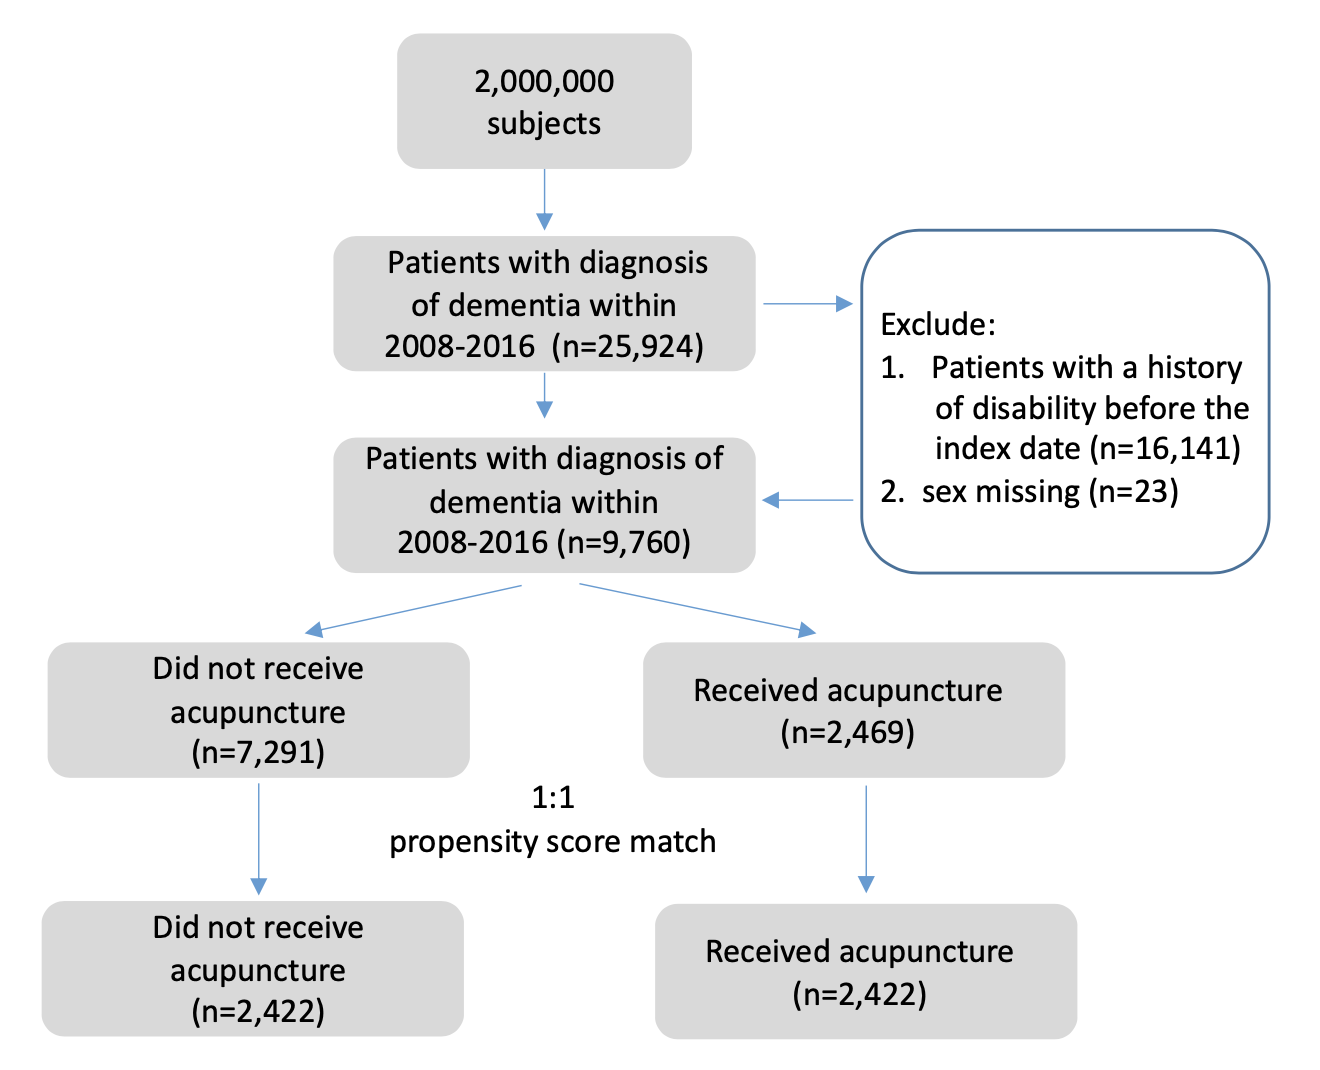
Supplementary Figure 1. The flowchart of selection of participants


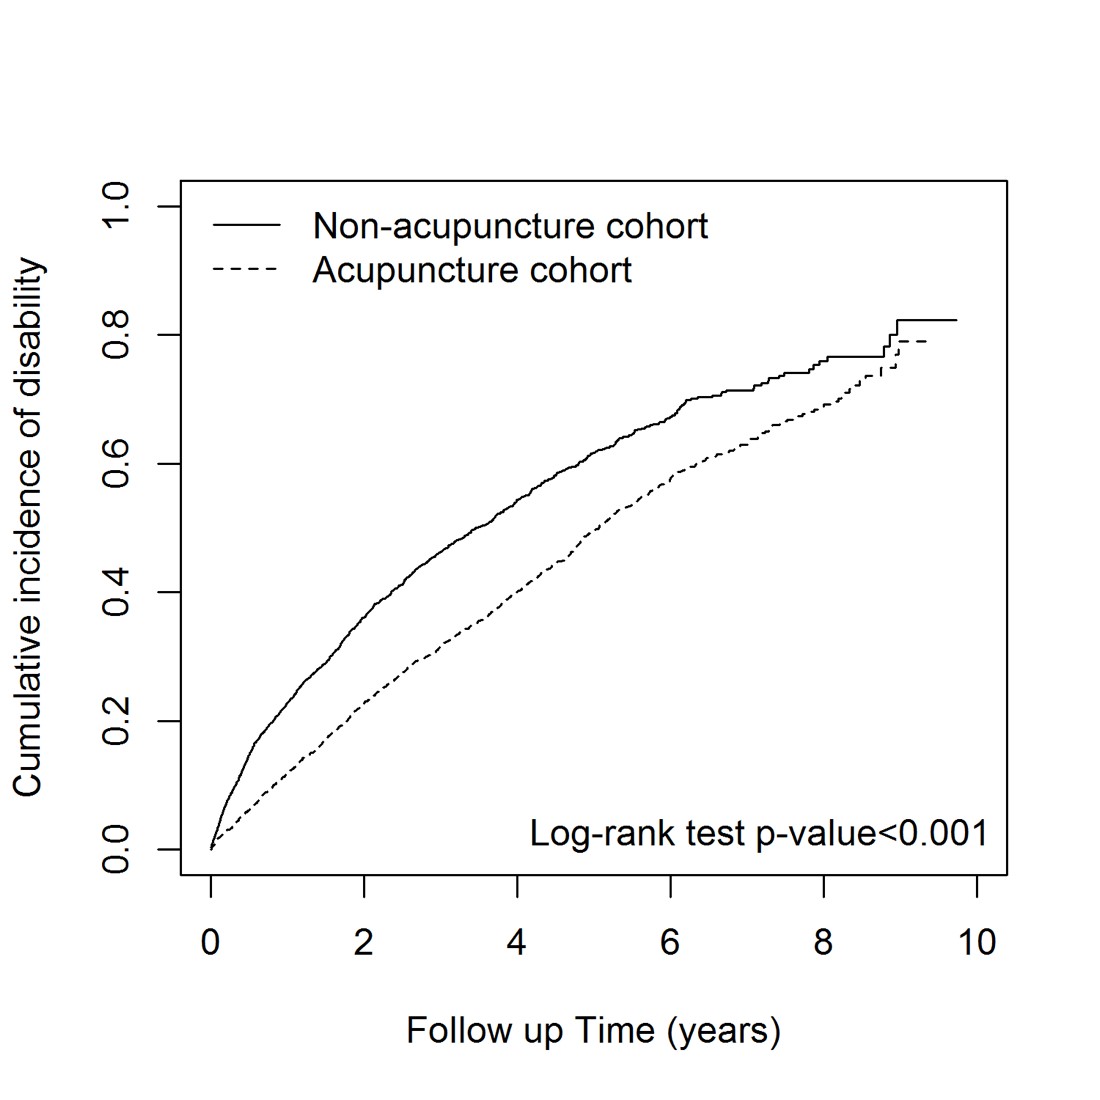


Supplementary Figure 2. The difference of cumulative incidence of disability between acupuncture and non-acupuncture cohorts


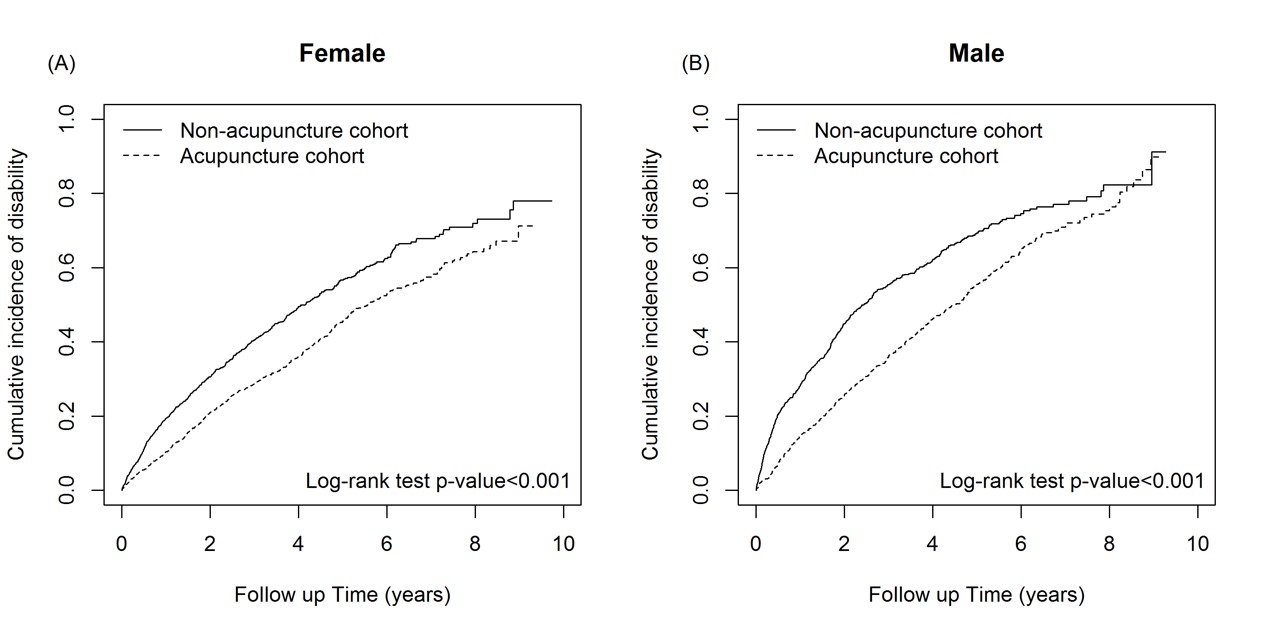


Supplementary Figure 3. The difference of cumulative incidence of disability between acupuncture and non-acupuncture cohorts: (A) female and (B) male


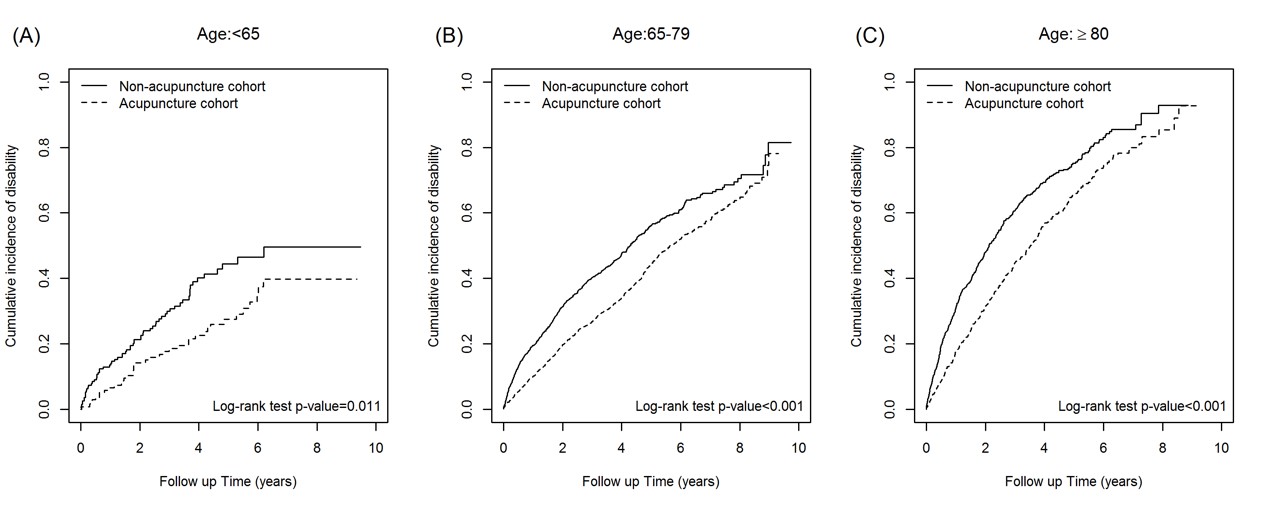


Supplementary Figure 4. The difference of cumulative incidence of disability between acupuncture and non-acupuncture cohorts: (A) <65-year-old, (B) 65-79-year-old, and (C) ≥80-year-old


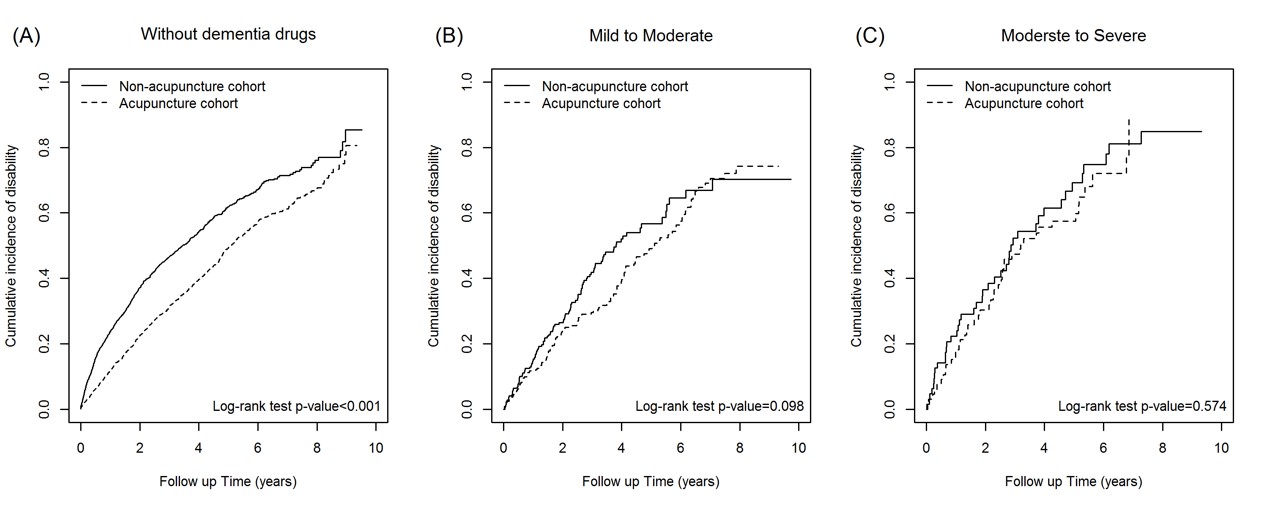


Supplementary Figure 5. The difference of cumulative incidence of disability between acupuncture and non-acupuncture cohorts: (A) no dementia drugs, (B) drugs for mild to moderate dementia, and (C) drugs for moderate to severe dementia

**Supplementary Tables**

| Supplementary Table 1. Distributions of different types of acupuncture | |  |
| --- | --- | --- |
| Types | Frequency | Percent |
| Manual acupuncture | 2,052 | 86.36% |
| Electroacupuncture | 36 | 1.52% |
| Combination of manual acupuncture and electroacupuncture | 288 | 12.12% |

| Supplementary Table 2. Cox model with hazard ratios and 95% confidence intervals of disability associated with different types of acupuncture | | | | | | | | |  |
| --- | --- | --- | --- | --- | --- | --- | --- | --- | --- |
|  |  |  |  |  |  |  |  |  |  |
|  | Disability | | |  |  |  |  |  |  |
| Variable | Event | PY | IR | cHR | (95% CI) | p-value | aHR | (95% CI) | p-value |
| Acupuncture intervention |  |  |  |  |  |  |  |  |  |
| No | 1,263 | 5,824 | 216.85 | 1.00 | (reference) | - | 1.00 | (reference) | - |
| Manual acupuncture | 932 | 6,720 | 138.69 | 0.65 | (0.59, 0.70)*** | <0.001 | 0.63 | (0.58, 0.69)*** | <0.001 |
| Electroacupuncture | 14 | 141 | 99.53 | 0.47 | (0.28, 0.79)** | 0.0047 | 0.51 | (0.3, 0.87)* | 0.0128 |
| Combination of manual acupuncture  and electroacupuncture | 134 | 1,023 | 130.98 | 0.61 | (0.51, 0.73)*** | <0.001 | 0.61 | (0.51, 0.72)*** | <0.001 |

*:p-value < 0.05.

**: p-value < 0.01.

***: p-value < 0.001.

Abbreviations: PY: Person-Year, IR: Incidence rate, per 1000 persons/years; HR: Hazard ratio; CI: confidence interval.
